# Supplementary material for: Complex Molecular Evolution and Expression of Expansin Gene Families in Three Basic Diploid Species of Brassica
Source: MDPI journal article supplement (doi:10.3390/ijms21103424), 2020-05-12
Supplement: s1 [file s1]

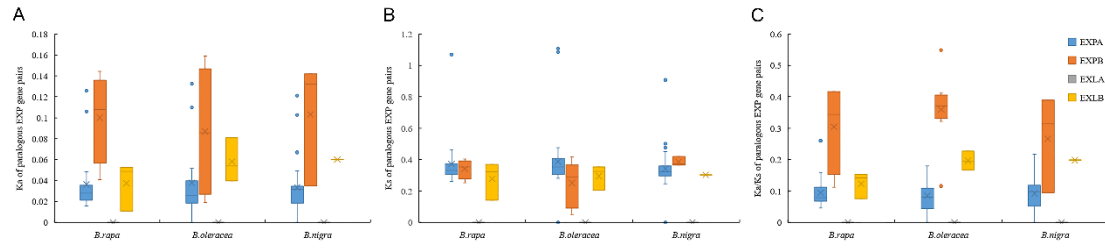

**Fig. S2.** The  $K_a$ ,  $K_s$ ,  $K_a/K_s$  distributions of paralogous expansin gene pairs in *B. rapa*, *B. oleracea*, and *B. nigra*. (A–C) Box plots of  $K_a$ ,  $K_s$ , and  $K_a/K_s$  of orthologs. Vertical lines represent the range of values, boxes represent interquartile distances, and the colored line represents the median. The circle represents the abnormal values and the cross represents the average values.

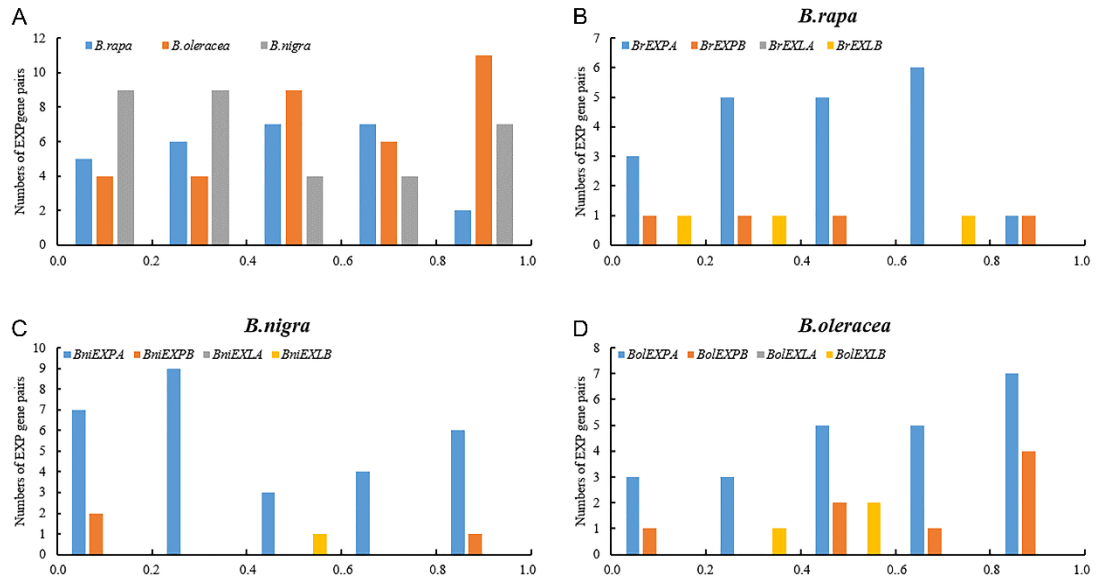

**Fig. S3.** The  $d_{SM}$  distributions of paralogous expansin gene pairs in *B. rapa*, *B. oleracea*, and *B. nigra*. (A) The  $d_{SM}$  distribution of expansin gene pairs in three basic species of *Brassica*. (B–D) The  $d_{SM}$  distribution of expansin gene pairs in four subfamilies of *B. rapa* (B), *B. oleracea* (C), and *B. nigra* (D). Paralogous gene pairs did not exist in the EXLA subfamilies of three *Brassica* subspecies.
