# Supplementary material for: Complex Molecular Evolution and Expression of Expansin Gene Families in Three Basic Diploid Species of Brassica
Source: MDPI journal article supplement (doi:10.3390/ijms21103424), 2020-05-12
Supplement: s1 [file s1]

**Supporting Information Table S5.** Detection of selection for expansin genes using branch model of EasyCodeML in different subgroups.

| Species                     | Model             | Estimates of parameters            | ln <i>L</i> | <i>LRT p</i> -value |
|-----------------------------|-------------------|------------------------------------|-------------|---------------------|
| <i>Arabidopsis thaliana</i> | Model 0           | $\omega_0=0.137$ for all subgroups | -13843.915  |                     |
|                             | Two Ratio Model 2 | $\omega_1=0.058$ for EXPA-I        | -13843.201  | 0.232               |
|                             |                   | $\omega_2=0.078$ for EXPA-II       | -13842.549  | 0.098               |
|                             |                   | $\omega_3=0.287$ for EXPA-III      | -13843.588  | 0.419               |
|                             |                   | $\omega_4=0.316$ for EXPA-IV       | -13842.971  | 0.170               |
|                             |                   | $\omega_5=0.285$ for EXPA-V        | -13842.193  | 0.063               |
|                             |                   | $\omega_6=0.372$ for EXPA-VI       | -13841.691  | 0.035               |
|                             |                   | $\omega_7=0.005$ for EXPA-VII      | -13841.815  | 0.040               |
|                             |                   | $\omega_8=0.004$ for EXPA-VIII     | -13842.144  | 0.060               |
|                             |                   | $\omega_9=0.155$ for EXPA-IX       | -13843.889  | 0.823               |
|                             |                   | $\omega_{10}=0.283$ for EXPA-X     | -13843.356  | 0.290               |
|                             |                   | $\omega_{11}=0.034$ for EXPA-XI    | -13843.774  | 0.60                |
|                             |                   | $\omega_{12}=0.002$ for EXPA-XII   | -13840.674  | 0.011               |
|                             |                   | $\omega_{13}=0.001$ for EXPB-I     | -13842.554  | 0.099               |
|                             |                   | $\omega_{14}=0.003$ for EXPB-II    | -13841.753  | 0.038               |
|                             |                   | $\omega_{15}=0.087$ for EXLA-I     | -13843.770  | 0.590               |
|                             |                   | $\omega_{16}=0.041$ for EXLB-I     | -13842.509  | 0.094               |
| <i>Brassica rapa</i>        | Model 0           | $\omega_0=0.118$ for all subgroups | -13413.619  |                     |
|                             | Two Ratio Model 2 | $\omega_1=0.234$ for EXPA-I        | -13413.318  | 0.438               |
|                             |                   | $\omega_2=0.102$ for EXPA-II       | -13413.520  | 0.658               |
|                             |                   |                                    |             |                     |

|                          |                   |                         |            |       |
|--------------------------|-------------------|-------------------------|------------|-------|
| <i>Brassica oleracea</i> | Model 0           | $\omega_3=0.343$ for    |            |       |
|                          |                   | EXPA-III                | -13412.862 | 0.219 |
|                          |                   | $\omega_4=1.148$ for    |            |       |
|                          |                   | EXPA-IV                 | -13410.874 | 0.019 |
|                          |                   | $\omega_5=0.147$ for    |            |       |
|                          |                   | EXPA-V                  | -13413.507 | 0.636 |
|                          |                   | $\omega_6=0.421$ for    |            |       |
|                          |                   | EXPA-VI                 | -13411.938 | 0.067 |
|                          |                   | $\omega_7=0.102$ for    |            |       |
|                          |                   | EXPA-VII                | -13413.591 | 0.815 |
|                          |                   | $\omega_8=0.196$ for    |            |       |
|                          |                   | EXPA-VIII               | -13413.212 | 0.367 |
|                          |                   | $\omega_9=0.161$ for    |            |       |
|                          |                   | EXPA-IX                 | -13413.530 | 0.674 |
|                          |                   | $\omega_{10}=0.115$ for |            |       |
|                          |                   | EXPA-X                  | -13413.618 | 0.981 |
|                          |                   | $\omega_{11}=0.400$ for |            |       |
|                          |                   | EXPA-XI                 | -13412.164 | 0.088 |
|                          |                   | $\omega_{12}=0.205$ for |            |       |
|                          |                   | EXPA-XII                | -13413.586 | 0.798 |
|                          |                   | $\omega_{13}=0.001$ for |            |       |
|                          |                   | EXPB-I                  | -13411.777 | 0.055 |
|                          |                   | $\omega_{14}=0.003$ for |            |       |
|                          |                   | EXPB-II                 | -13409.574 | 0.004 |
|                          |                   | $\omega_{15}=0.345$ for |            |       |
|                          |                   | EXLA-I                  | -13413.223 | 0.374 |
|                          | Two Ratio Model 2 | $\omega_{16}=0.005$ for |            |       |
|                          |                   | EXLB-I                  | -13411.967 | 0.069 |
|                          |                   | $\omega_0=0.107$ for    |            |       |
|                          |                   | all subgroups           | -7890.958  |       |
|                          |                   | $\omega_1=0.366$ for    |            |       |
|                          |                   | EXPA-I                  | -7890.767  | 0.538 |
|                          |                   | $\omega_2=0.098$ for    |            |       |
|                          |                   | EXPA-II                 | -7890.945  | 0.871 |
|                          |                   | $\omega_3=0.177$ for    |            |       |
|                          |                   | EXPA-III                | -7890.179  | 0.442 |
|                          |                   | $\omega_4=0.948$ for    |            |       |
|                          |                   | EXPA-IV                 | -7889.036  | 0.050 |
|                          |                   | $\omega_5=0.022$ for    |            |       |
|                          |                   | EXPA-V                  | -7890.170  | 0.209 |
|                          |                   | $\omega_6=0.026$ for    |            |       |
|                          |                   | EXPA-VI                 | -7889.862  | 0.139 |
|                          |                   | $\omega_7=0.066$ for    |            |       |
|                          |                   | EXPA-VII                | -7890.870  | 0.675 |

|                       |                   |                         |            |        |
|-----------------------|-------------------|-------------------------|------------|--------|
| <i>Brassica nigra</i> | Model 0           | $\omega_8=0.037$ for    |            |        |
|                       |                   | EXPA-VIII               | -7889.995  | 0.165  |
|                       |                   | $\omega_9=0.316$ for    |            |        |
|                       |                   | EXPA-IX                 | -7889.935  | 0.153  |
|                       |                   | $\omega_{10}=0.051$ for |            |        |
|                       |                   | EXPA-X                  | -7890.813  | 0.591  |
|                       |                   | $\omega_{11}=1.468$ for |            |        |
|                       |                   | EXPA-XI                 | -7890.265  | 0.239  |
|                       |                   | $\omega_{12}=0.243$ for |            |        |
|                       |                   | EXPA-XII                | -7890.429  | 0.304  |
|                       |                   | $\omega_{13}=0.058$ for |            |        |
|                       |                   | EXPB-I                  | -7890.949  | 0.891  |
|                       |                   | $\omega_{14}=0.002$ for |            |        |
|                       |                   | EXPB-II                 | -7889.389  | 0.077  |
|                       |                   | $\omega_{15}=0.121$ for |            |        |
|                       | Two Ratio Model 2 | EXLA-I                  | -7890.952  | 0.914  |
|                       |                   | $\omega_{16}=0.056$ for |            |        |
|                       |                   | EXLB-I                  | -7890.769  | 0.539  |
|                       |                   | $\omega_0=0.125$ for    |            |        |
|                       |                   | all subgroups           | -11781.484 |        |
|                       |                   | $\omega_1=2.510$ for    |            |        |
|                       |                   | EXPA-I                  | -11779.870 | 0.0724 |
|                       |                   | $\omega_2=2.510$ for    |            |        |
|                       |                   | EXPA-II                 | -11779.870 | 0.0724 |
|                       |                   | $\omega_3=0.250$ for    |            |        |
|                       |                   | EXPA-III                | -11781.137 | 0.405  |
|                       |                   | $\omega_4=0.686$ for    |            |        |
|                       |                   | EXPA-IV                 | -11781.125 | 0.397  |
|                       |                   | $\omega_5=0.144$ for    |            |        |
|                       |                   | EXPA-V                  | -11781.444 | 0.777  |
|                       |                   | $\omega_6=0.125$ for    |            |        |
|                       |                   | EXPA-VI                 | -11781.484 | 0.998  |
|                       |                   | $\omega_7=0.028$ for    |            |        |
|                       |                   | EXPA-VII                | -11780.648 | 0.196  |
|                       |                   | $\omega_8=0.132$ for    |            |        |
|                       |                   | EXPA-VIII               | -11781.480 | 0.929  |
|                       |                   | $\omega_9=0.123$ for    |            |        |
|                       |                   | EXPA-IX                 | -11781.484 | 0.988  |
|                       |                   | $\omega_{10}=0.030$ for |            |        |
|                       |                   | EXPA-X                  | -11781.311 | 0.557  |
|                       |                   | $\omega_{11}=1.195$ for |            |        |
|                       |                   | EXPA-XI                 | -11777.456 | 0.005  |
|                       |                   | $\omega_{12}=1.019$ for |            |        |
|                       |                   | EXPA-XII                | -11781.280 | 0.523  |

|                         |            |       |
|-------------------------|------------|-------|
| $\omega_{13}=0.243$ for |            |       |
| EXPB-I                  | -11781.475 | 0.897 |
| $\omega_{14}=0.070$ for |            |       |
| EXPB-II                 | -11781.403 | 0.688 |
| $\omega_{15}=0.158$ for |            |       |
| EXLA-I                  | -11781.441 | 0.771 |
| $\omega_{16}=0.128$ for |            |       |
| EXLB-I                  | -11781.483 | 0.974 |

---

$\ln L$  the log-likelihood value,  $LRT$   $p$ -value the likelihood ratio test  $p$  value

**Supporting Information Table S6.** The mean evolutionary rates ( $Ka$ ,  $Ks$  and  $Ka/Ks$ ) and promoter divergences ( $d_{SM}$ ) of different subfamilies' paralogous expansin genes in *B. rapa*, *B. oleracea*, and *B. nigra*.

|                                                 |          | EXPA         | EXPB         | EXLA | EXLB         |
|-------------------------------------------------|----------|--------------|--------------|------|--------------|
| <b><i>B. rapa</i> vs <i>B. rapa</i></b>         | $Ka$     | 0.027(0.008) | 0.120(0.021) | N/A  | 0.037(0.023) |
|                                                 | $Ks$     | 0.336(0.048) | 0.341(0.063) | N/A  | 0.346(0.035) |
|                                                 | $Ka/Ks$  | 0.086(0.030) | 0.368(0.082) | N/A  | 0.147(0.007) |
|                                                 | $d_{SM}$ | 0.492(0.235) | 0.436(0.364) | N/A  | 0.449(0.233) |
| <b><i>B. oleracea</i> vs <i>B. oleracea</i></b> | $Ka$     | 0.027(0.011) | 0.123(0.036) | N/A  | 0.058(0.021) |
|                                                 | $Ks$     | 0.348(0.043) | 0.315(0.097) | N/A  | 0.295(0.078) |
|                                                 | $Ka/Ks$  | 0.093(0.054) | 0.369(0.030) | N/A  | 0.196(0.030) |
|                                                 | $d_{SM}$ | 0.607(0.310) | 0.697(0.342) | N/A  | 0.456(0.112) |
| <b><i>B. nigra</i> vs <i>B. nigra</i></b>       | $Ka$     | 0.027(0.009) | 0.137(0.007) | N/A  | 0.060(N/A)   |
|                                                 | $Ks$     | 0.322(0.044) | 0.386(0.030) | N/A  | 0.303(N/A)   |
|                                                 | $Ka/Ks$  | 0.096(0.046) | 0.352(0.053) | N/A  | 0.198(N/A)   |
|                                                 | $d_{SM}$ | 0.480(0.337) | 0.342(0.398) | N/A  | 0.525(N/A)   |

Standard deviation is shown in parentheses
